# Supplementary figures and images for: Substance Use and the Paramedic Role: A Scoping Review
Source: Preprints.org preprint supplement (doi:10.20944/preprints202302.0038.v1), 2023-02-02

**Appendix 2. Data Extraction Form**

**
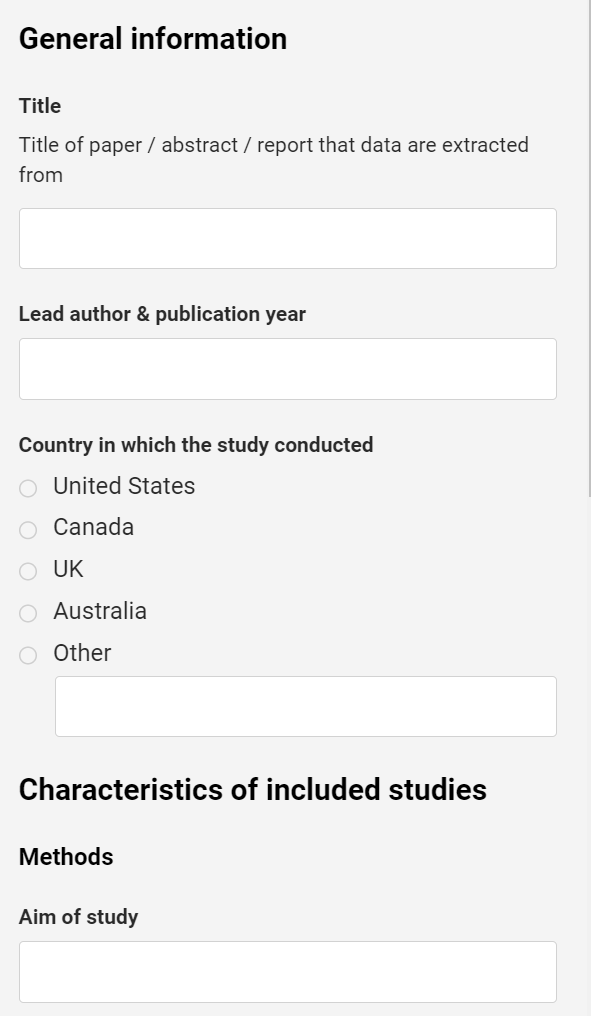

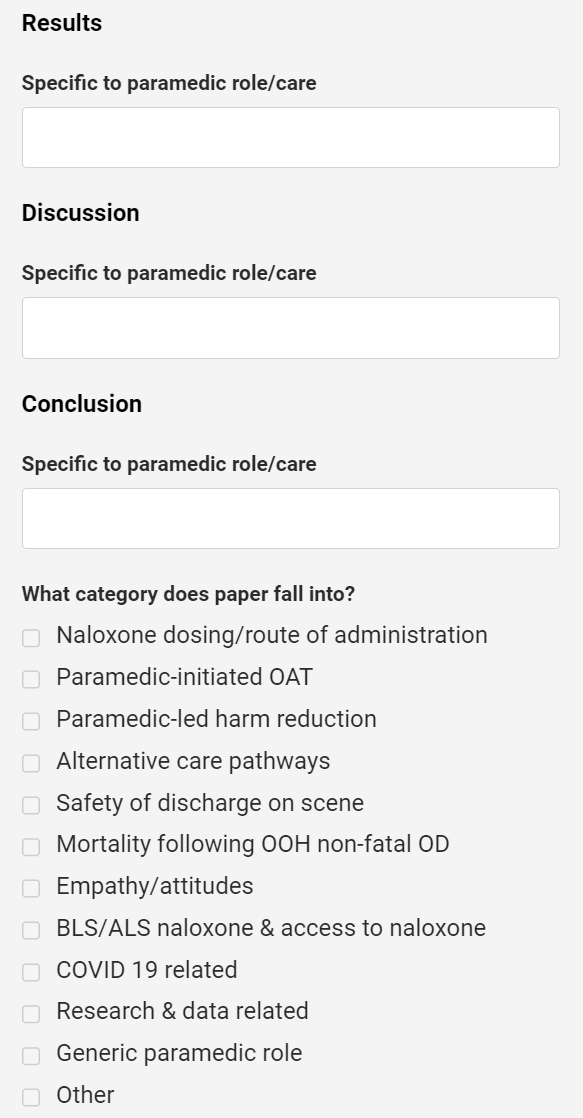
**

Supplement: Supplementary file 1 [file supplementary]
